# Supplementary material for: Synoptic Climatology of Pre-Monsoon Severe Lightning Events in Bangladesh
Source: Research Square preprint supplement (doi:10.21203/rs.3.rs-1502364/v1), 2022-04-07

**Synoptic Climatology of Pre-Monsoon Severe Lightning Events in Bangladesh**

***Supplement figure-1***

**
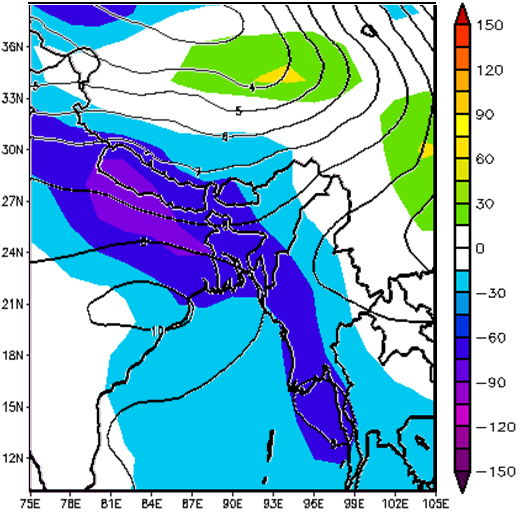
**

**Supplement Fig. 1.** Composite geographical distributions of June SLP (in Pa, shaded) and 500 hPa GpH (in gpm, solid line) anomalies compared with the climatology from 1981 to 2010.

**Supplement Table 1.** Atmospheric stability indices for Dhaka radiosonde station from March through June with their means and standard deviations


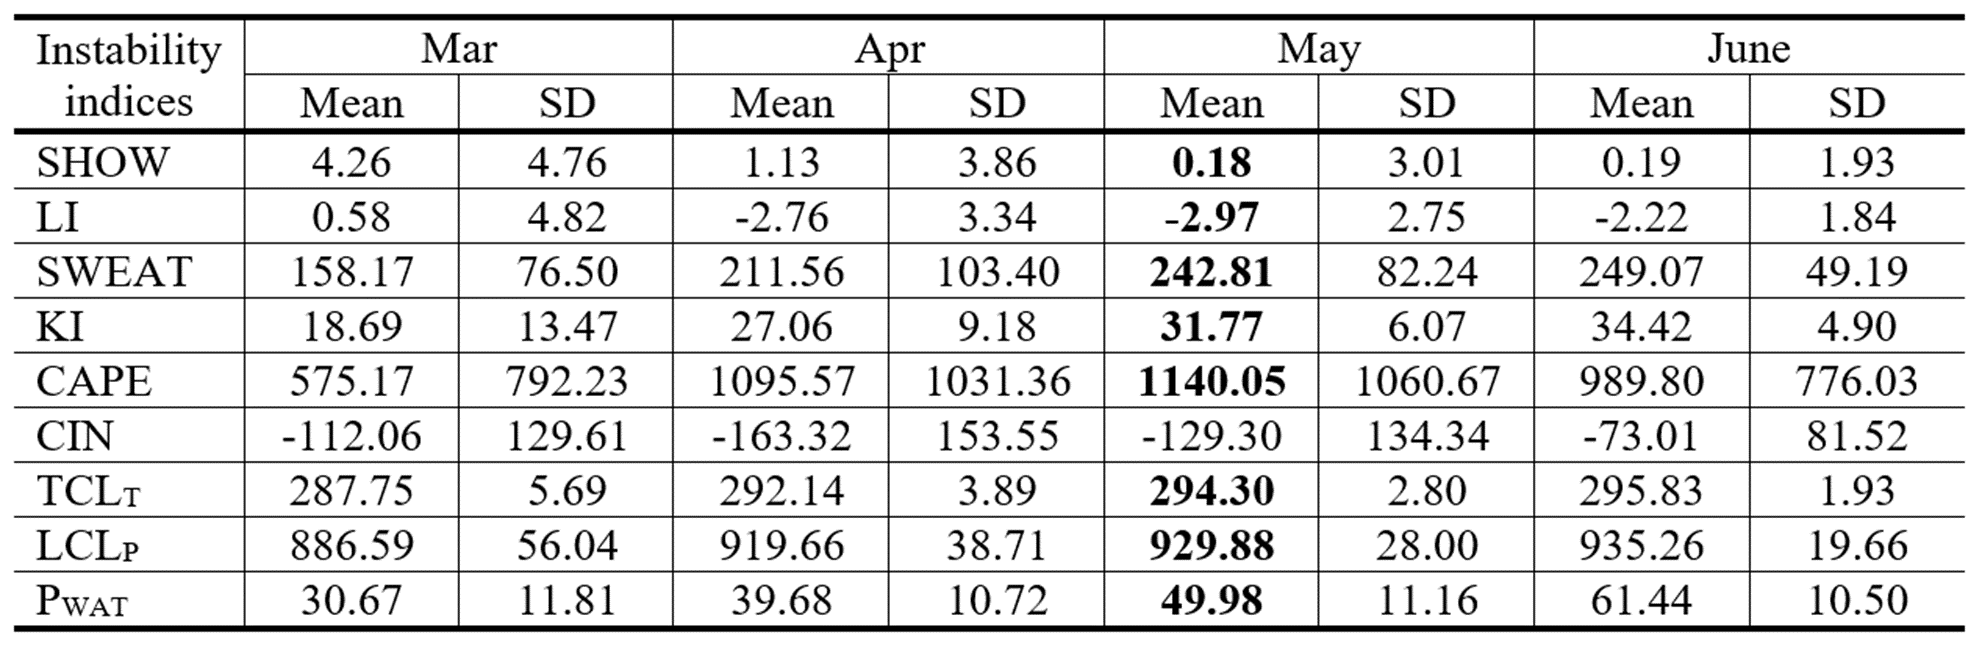

Supplement: Supplementary file 1 [file 08d21c94edb371077b92e203.docx]
